# Supplementary material
Source: MDPI journal article supplement (https://www.mdpi.com/2073-4433/8/2/38)
Supplement: s1 [file s1]

# Supplementary Materials: The Niger River Basin Moisture Sources: A Lagrangian Analysis

Rogert Sorí, Raquel Nieto, Anita Drumond and Luis Gimeno

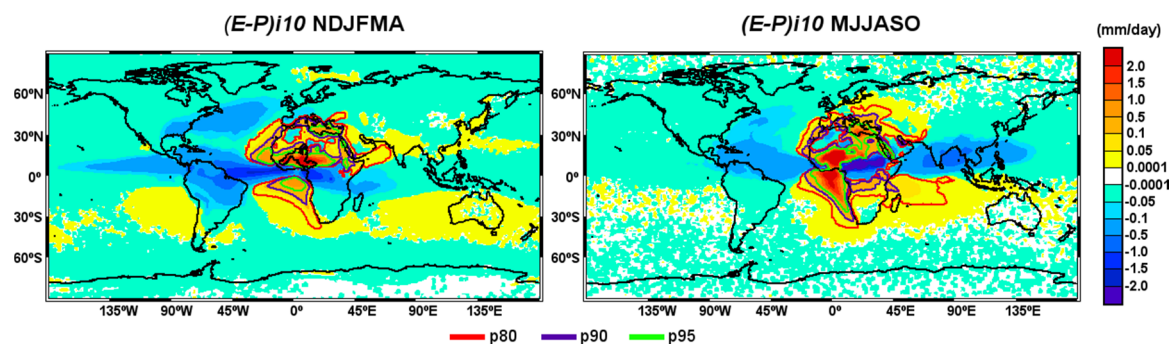

**Figure S1.** Average pattern of  $(E - P)$  backward results integrated from the Niger River Basin for all 10 days for the dry (a) and wet season (b). The lines red, purple and green represents the 80th, 90th and 95th percentile of the  $(E - P)i10 > 0$  values for every season.

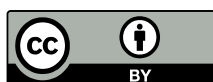

© 2017 by the authors; licensee MDPI, Basel, Switzerland. This article is an open access article distributed under the terms and conditions of the Creative Commons Attribution (CC BY) license (<http://creativecommons.org/licenses/by/4.0/>).
